# Supplementary material
Source: MDPI journal article supplement (https://www.mdpi.com/1999-4907/12/2/229)
Supplement: s1 [file s1]

|   |                                           |                        |       |   |      |      |   |   |   |      |     |      |     |   |     |      |      |
|---|-------------------------------------------|------------------------|-------|---|------|------|---|---|---|------|-----|------|-----|---|-----|------|------|
| 3 | <i>Phytophthora</i> sp. uncultured 11a    | ASV-25                 | 1274  | - | -    | -    | - | - | - | 167  | 325 | -    | -   | - | 172 | 610  | -    |
| 5 | <i>Phytophthora castaneae</i>             | ASV-33, 48             | 535   | - | -    | -    | - | - | - | 297  | 238 | -    | -   | - | -   | -    | -    |
| 6 | <i>Phytophthora lacustris</i>             | ASV-73                 | 60    | - | -    | -    | - | - | - | -    | -   | -    | -   | - | -   | 60   | -    |
| 6 | <i>Phytophthora megasperma/crassamura</i> | ASV-55                 | 258   | - | 78   | -    | - | - | - | -    | -   | -    | -   | - | 58  | 122  | -    |
| 6 | <i>Phytophthora</i> sp. uncultured 8a     | ASV-67                 | 142   | - | -    | -    | - | - | - | -    | 104 | -    | -   | - | -   | 38   | -    |
| 6 | <i>Phytophthora</i> sp. uncultured 9a     | ASV-68                 | 103   | - | -    | -    | - | - | - | -    | -   | -    | -   | - | -   | 103  | -    |
| 6 | <i>Phytophthora</i> sp. uncultured 15a    | ASV-42, 62             | 602   | - | -    | -    | - | - | - | -    | -   | 423  | 152 | - | 27  | -    | -    |
| 7 | <i>Phytophthora cinnamomi</i>             | ASV-10, 14             | 10583 | - | 2    | -    | - | - | - | 2358 | -   | 634  | -   | - | -   | 7589 | -    |
| 7 | <i>Phytophthora rubi/fragariae</i>        | ASV-26, 28, 41, 58, 76 | 7645  | - | 701  | 2637 | - | - | - | 391  | 432 | 1800 | 39  | - | 36  | -    | 1569 |
| 7 | <i>Phytophthora</i> sp. uncultured 1a     | ASV-24, 30, 59         | 2221  | - | -    | 447  | - | - | - | 1774 | -   | -    | -   | - | -   | -    | -    |
| 7 | <i>Phytophthora</i> sp. uncultured 3a     | ASV-27                 | 2715  | - | 2715 | -    | - | - | - | -    | -   | -    | -   | - | -   | -    | -    |
| 7 | <i>Phytophthora</i> sp. uncultured 4a     | ASV-46                 | 303   | - | -    | -    | - | - | - | -    | -   | -    | -   | - | -   | 303  | -    |
| 7 | <i>Phytophthora</i> sp. uncultured 5a     | ASV-57, 63, 80         | 344   | - | 176  | -    | - | - | - | -    | 12  | -    | -   | - | 150 | 6    | -    |
| 7 | <i>Phytophthora</i> sp. uncultured 6a     | ASV-49                 | 476   | - | 258  | -    | - | - | - | -    | 218 | -    | -   | - | -   | -    | -    |

|    |                                        |                 |       |       |      |      |      |      |      |      |      |      |      |      |       |       |
|----|----------------------------------------|-----------------|-------|-------|------|------|------|------|------|------|------|------|------|------|-------|-------|
| 7  | <i>Phytophthora</i> sp. uncultured 7a  | ASV-61          | 208   | -     | -    | -    | -    | -    | -    | -    | 208  | -    | -    | -    | -     | -     |
| 7  | <i>Phytophthora</i> sp. uncultured 16a | ASV-47, 59      | 765   | -     | -    | -    | -    | -    | -    | 173  | -    | -    | -    | -    | 592   | -     |
| 7  | <i>Phytophthora</i> sp. uncultured 21a | ASV-23, 32      | 5090  | -     | 1683 | -    | -    | -    | -    | -    | -    | -    | -    | 3407 | -     | -     |
| 7  | <i>Phytophthora</i> sp. uncultured 2a  | ASV-30          | 926   | -     | -    | -    | -    | -    | -    | -    | -    | -    | -    | 926  | -     | -     |
| 7  | <i>Phytophthora uniformis</i>          | ASV-72          | 61    | -     | -    | -    | -    | -    | -    | 61   | -    | -    | -    | -    | -     | -     |
| 8  | <i>Phytophthora austrocedri</i>        | ASV-5, 6, 79    | 26762 | 22815 | -    | -    | 89   | -    | -    | 6    | -    | 3852 | -    | -    | -     | -     |
| 8  | <i>Phytophthora foliorum</i>           | ASV-34, 45, 74  | 1540  | -     | -    | -    | -    | -    | -    | 278  | 123  | 391  | -    | -    | 197   | 551   |
| 8  | <i>Phytophthora obscura</i>            | ASV- 19, 21, 51 | 4669  | -     | 331  | 464  | 2722 | -    | -    | 216  | 144  | -    | 792  | -    | -     | -     |
| 8  | <i>Phytophthora primulae</i>           | ASV-13          | 7117  | -     | -    | 1651 | -    | -    | -    | -    | -    | 4048 | -    | -    | 1418  | -     |
| 8  | <i>Phytophthora ramorum</i>            | ASV-7, 9, 77    | 15194 | -     | 49   | -    | 3451 | -    | -    | -    | -    | -    | 6739 | -    | 782   | 4173  |
| 8  | <i>Phytophthora syringae</i>           | ASV-1, 2, 8, 69 | 83642 | -     | 7223 | 1357 | -    | 3325 | -    | 2349 | 7101 | 9857 | 9157 | 2583 | 29600 | 11090 |
| 9  | <i>Phytophthora fallax</i>             | ASV-44, 54      | 401   | -     | -    | -    | -    | -    | -    | 179  | 5    | 126  | 49   | -    | 42    | -     |
| 10 | <i>Phytophthora kernoviae</i>          | ASV-20, 31      | 2980  | -     | -    | -    | -    | -    | 1944 | -    | -    | -    | -    | 1036 | -     | -     |
| 11 | <i>Phytophthora</i> sp. uncultured 18a | ASV-22          | 1494  | -     | -    | 555  | -    | -    | -    | 525  | -    | 414  | -    | -    | -     | -     |
| 11 | <i>Phytophthora</i> sp. uncultured 19a | ASV-11, 38      | 3915  | -     | -    | 1807 | -    | -    | -    | 1095 | -    | 464  | -    | 549  | -     | -     |

[illegible]

**Supplementary Table 2:** Distribution of the different Amplicon Sequence Variants of *Phytophthora/Nothophytophthora* spp. and number of reads identified using the COI marker across the 14 sites “disturbed” and “undisturbed” sites sampled in this study.

[illegible]

[illegible]

**Supplementary Table 3.** Permutational multivariate analysis of variance (PERMANOVA) and permutational analysis of multivariate dispersion (Betadisper) results based on Bray-Curtis and Jaccard distances using Hellinger data transformation, for *Phytophthora/Nothophytophthora* spp. community composition data using ITS and COI marker genes

| Marker | Distance-based matrix | Statistical Test | Statistical parameter | Significance level     |
|--------|-----------------------|------------------|-----------------------|------------------------|
| ITS    | Bray-Curtis           | PERMANOVA        | $F_{1,79} = 3.4729$   | $\Pr(>F) = 0.002^{**}$ |
|        | Bray-Curtis           | Betadisper       | $F_{1,79} = 6.8149$   | $\Pr(>F) = 0.011^*$    |
|        | Jaccard               | PERMANOVA        | $F_{1,79} = 2.9819$   | $\Pr(>F) = 0.003^{**}$ |
|        | Jaccard               | Betadisper       | $F_{1,79} = 3.4272$   | $\Pr(>F) = 0.08 .$     |
| COI    | Bray-Curtis           | PERMANOVA        | $F_{1,40} = 2.6866$   | $\Pr(>F) = 0.009^{**}$ |
|        | Bray-Curtis           | Betadisper       | $F_{1,40} = 4.4969$   | $\Pr(>F) = 0.045^*$    |
|        | Jaccard               | PERMANOVA        | $F_{1,40} = 2.2232$   | $\Pr(>F) = 0.002^{**}$ |
|        | Jaccard               | Betadisper       | $F_{1,40} = 1.4843$   | $\Pr(>F) = 0.217$      |
