# Supplementary material
Source: MDPI journal article supplement (https://www.mdpi.com/1999-4907/12/2/229)

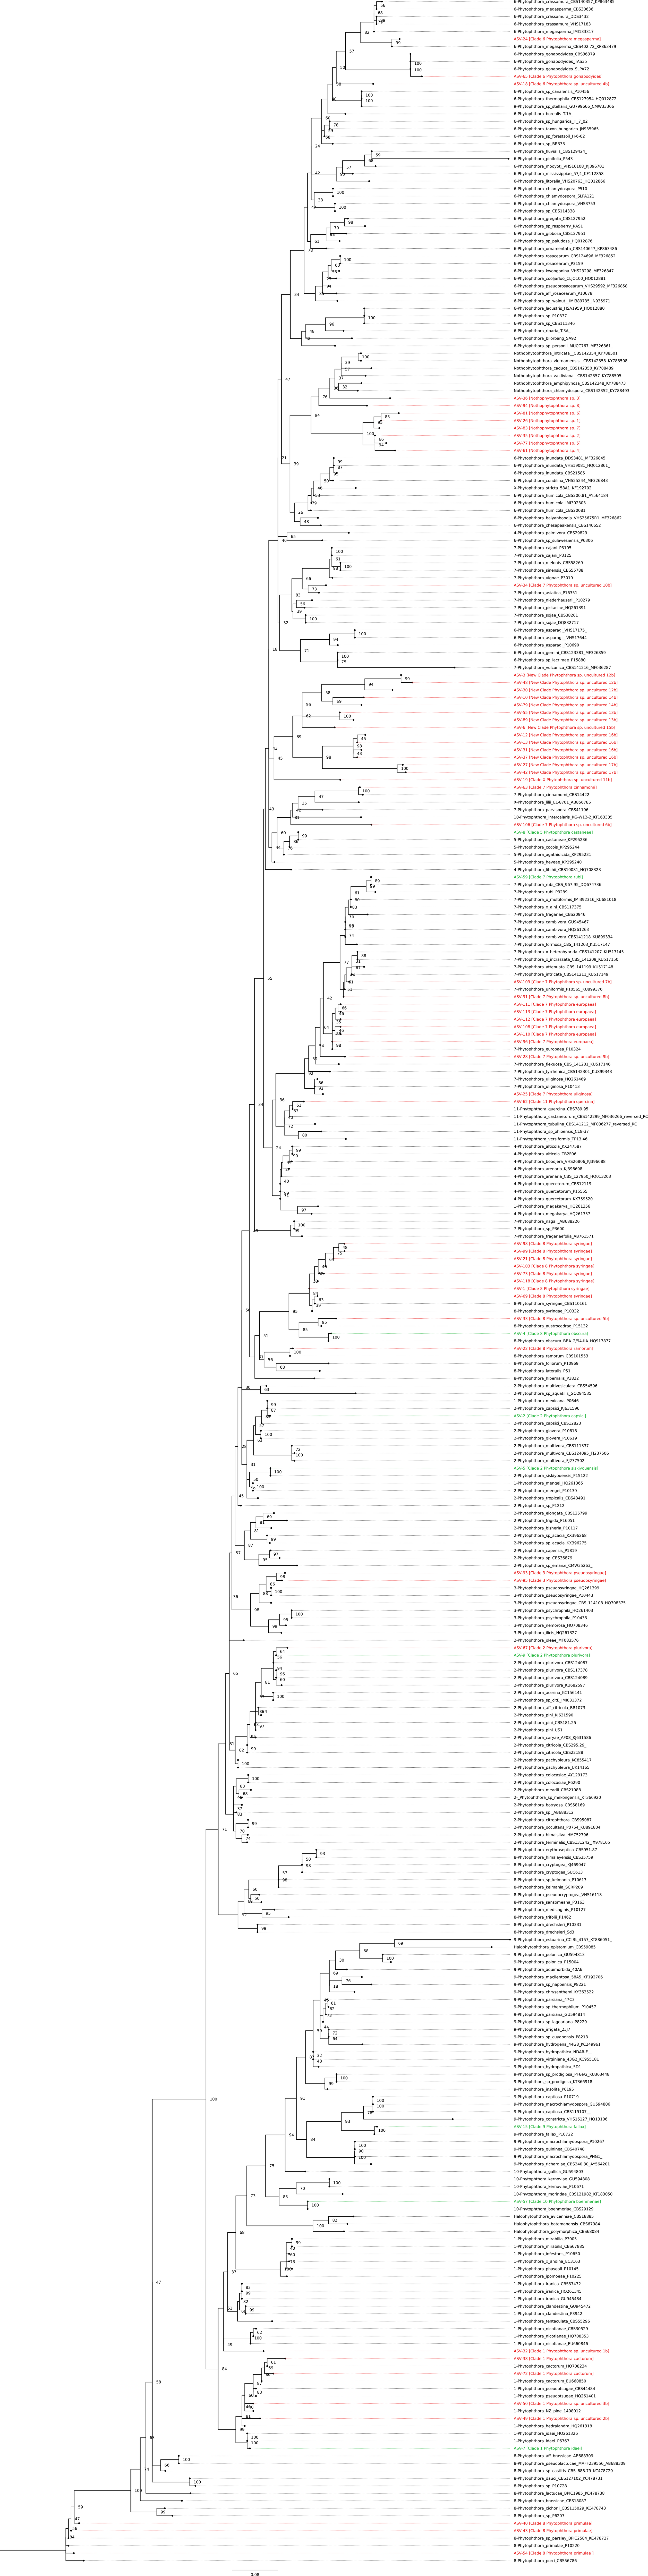

Supplement: s1 [file s1]

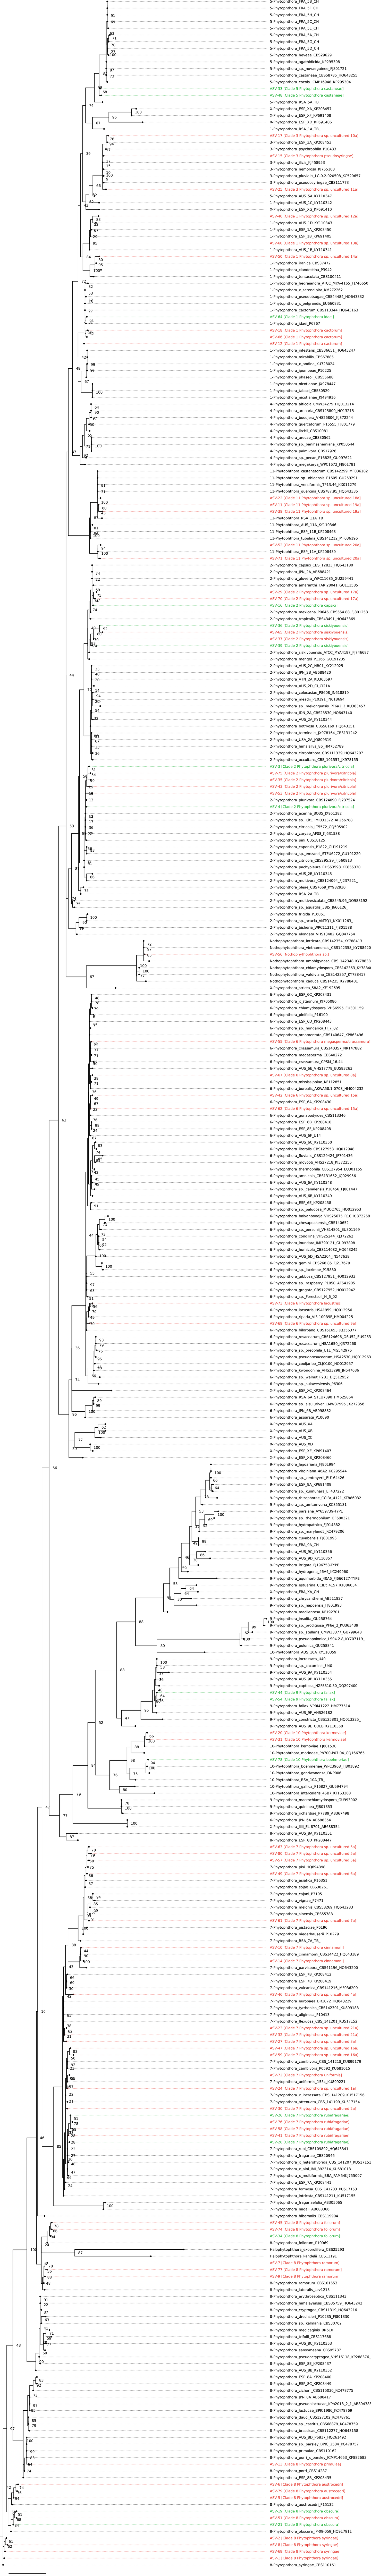

Supplement: s1 [file s1]
